# Supplementary material
Source: PubMed Central journal article supplement (PMC3569724)
Supplement: NIHMS270013-supplement-Supplemental_Figure_1.pdf [file NIHMS270013-supplement-Supplemental_Figure_1.pdf]

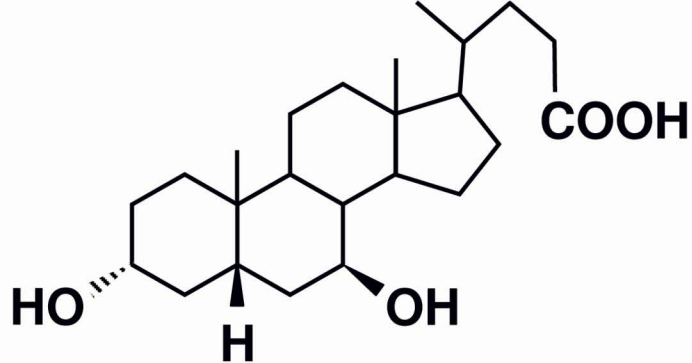

Ursodeoxycholic acid (UDCA)

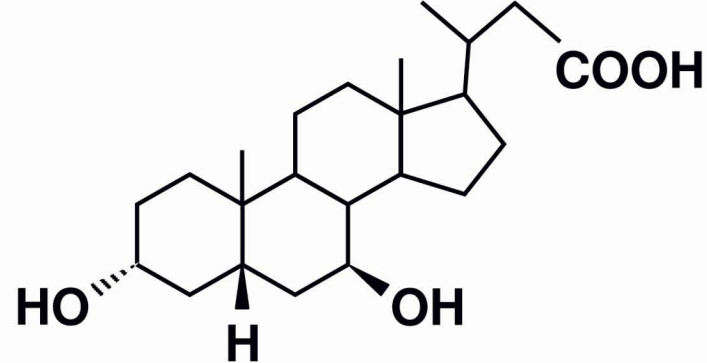

24-*nor*Ursodeoxycholic acid (*nor*UDCA)

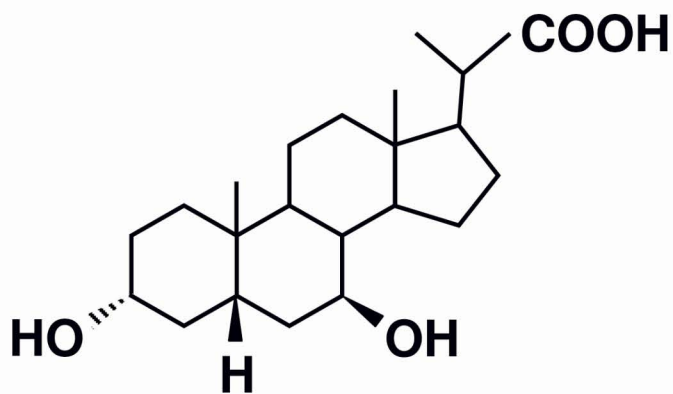

23,24-di-*nor*Ursodeoxycholic acid (*dinor*UDCA)

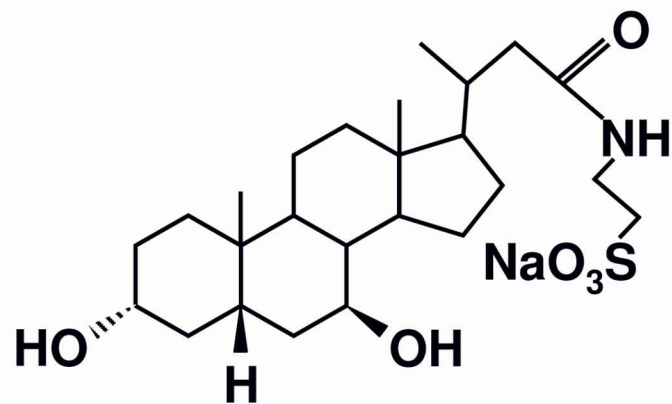

Tauro-*nor*Ursodeoxycholic acid (T-*nor*UDCA)
