# Supplementary material
Source: PubMed Central journal article supplement (PMC3569724)
Supplement: NIHMS270013-supplement-Supplemental_Table_and_figure_legends.pdf [file NIHMS270013-supplement-Supplemental_Table_and_figure_legends.pdf]

## Supplementary Data

**Supplementary Table 1. Synopsis of findings**

| Variable                               | <i>norUDCA</i> | T- <i>norUDCA</i> | <i>dinorUDCA</i> |
|----------------------------------------|----------------|-------------------|------------------|
| <b>Histology</b>                       | improved       | slightly improved | worsened         |
| <b>Serum AST and AP</b>                | improved       | unchanged         | worsened         |
| <b>Biliary bicarbonate output</b>      | increased      | less increased    | unchanged        |
| <b>Detoxification pathways</b>         | induced        | unchanged         | induced          |
| <b>Cholangiocyte secretion</b>         | stimulated     | less stimulated   | less stimulated  |
| <b>Biliary bile acid concentration</b> | unchanged      | unchanged         | unchanged        |
| <b>Hepatic bile acid levels</b>        | increased      | unchanged         | unchanged        |
| <b>Serum bile acid levels</b>          | increased      | unchanged         | unchanged        |

*NorUDCA*-fed animals (*norUDCA*), tauro-*norUDCA*-fed animals (T-*norUDCA*), *dinorUDCA*-fed animals (*dinorUDCA*).

**Supplementary Figure S1. Structures of *norUDCA*, tauro-*norUDCA* and *dinorUDCA*.** *Nor*-ursodeoxycholic acid (*norUDCA*) results from side chain-shortening of ursodeoxycholic acid (*UDCA*) by one methyl group. Side chain shortening of *norUDCA* by another methyl group results in *dinor*ursodeoxycholic acid (*dinorUDCA*). Tauro-*nor*ursodeoxycholic acid (T-*norUDCA*) was obtained by taurine-conjugation of *norUDCA*.

**Supplementary Figure S2. *NorUDCA* is more effective than tauro-*norUDCA* and *dinorUDCA* in reducing sclerosing cholangitis and biliary fibrosis in *Mdr2*<sup>-/-</sup> mice.** Liver histology (H&E staining) in standard chow-fed (Control), *norUDCA*-fed, tauro-*norUDCA*-fed (T-*norUDCA*), and *dinorUDCA*-fed *Mdr2*<sup>-/-</sup> mouse (original magnification 20x). Compared to striking

reduction of bile duct injury in *norUDCA*-treated *Mdr2*<sup>-/-</sup> mouse, the effects of tauro-*norUDCA* are much weaker. Di*norUDCA* had no influence on large bile duct injury. **bd**, bile duct; **pv**, portal vein.
