# Supplementary material
Source: PubMed Central journal article supplement (PMC3569724)

Control

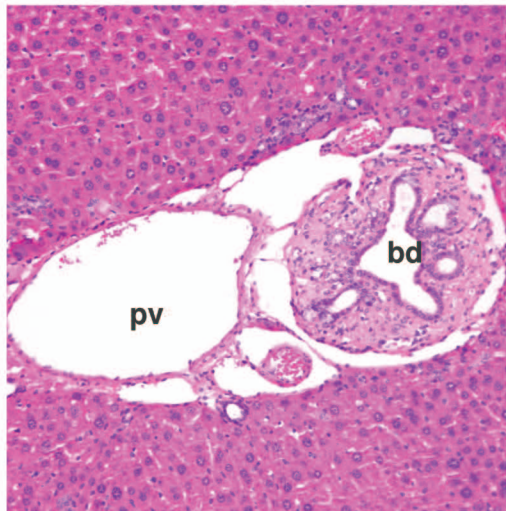

*nor*UDCA

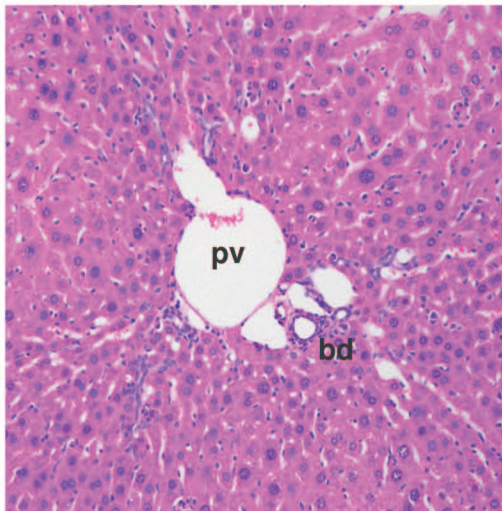

T-*nor*UDCA

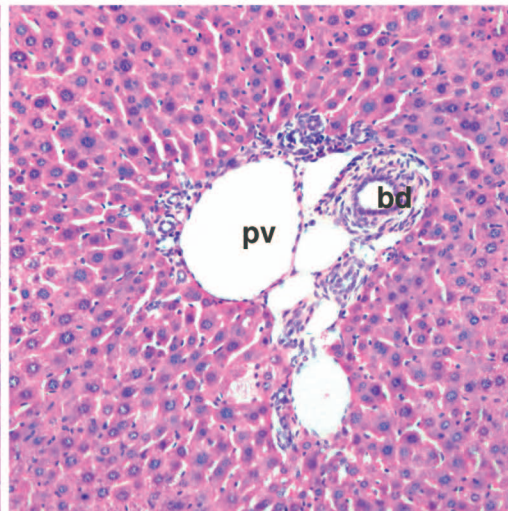

*dinor*UDCA

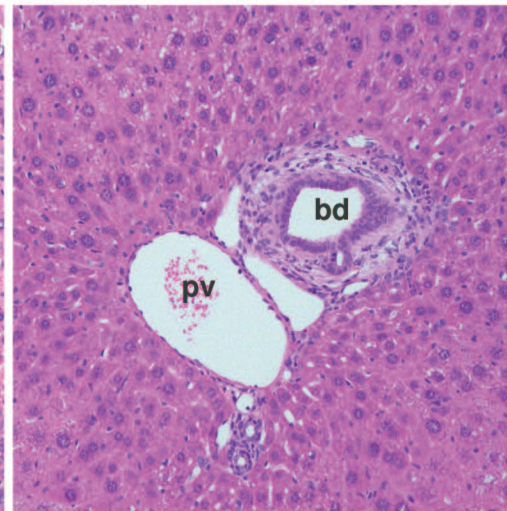

Supplement: NIHMS270013-supplement-Supplemental_Figure_2.pdf [file NIHMS270013-supplement-Supplemental_Figure_2.pdf]
